# Supplementary material for: Platelet-Derived Extracellular Vesicles Promote Tenogenic Differentiation of Stem Cells on Bioengineered Living Fibers
Source: MDPI journal article supplement (doi:10.3390/ijms24043516), 2023-02-09
Supplement: s1 [file s1]

## ***Supplementary Materials***

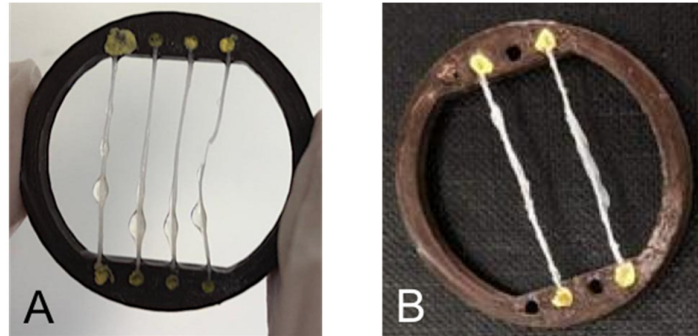

**Figure S1. Collagen coating optimization.** To obtain a uniform layer of collagen around the yarns, different formulations were tested. (A) Human collagen (Sigma-Aldrich, USA) + 10 U human transglutaminase (Zedira GmbH, Germany); (B) Bovine collagen (PureCol EZ Gel solution, 5074, Sigma-Aldrich, USA) + 10 U transglutaminase (Zedira GmbH, Germany). Yarns were coated with 100  $\mu$ L of the collagen solutions and then incubated for 1 h at 37 °C under humidified conditions to allow gelation of the solution.

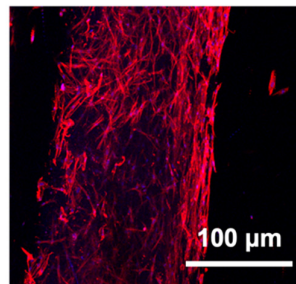

**Figure S2. hASCs encapsulated in collagen-coated yarns after 3 days of culture.** Cells were stained with Phalloidin-Rhodamine (cytoskeleton, red) and DAPI (nuclei, blue).

**Table S1.** Primer sequences used for RT-qPCR analysis.

| Gene                                  | Primer Sequence                                           | Accession Number |
|---------------------------------------|-----------------------------------------------------------|------------------|
| <b>Housekeeping Genes</b>             |                                                           |                  |
| <i>GAPDH</i>                          | F: TGCACCACCAACTGCTTAGC<br>R: GGCATGGACTGTGGTCATGAG       | NM_33197         |
| <i>GUSB</i>                           | F: GATGTAGGTGGTGGGTGTCTG<br>R: GCTCCGAATCACTATCGCCA       | NM_000181.4      |
| <b>Tenogenic-related Genes</b>        |                                                           |                  |
| <i>MKX</i>                            | F: TCGCACAGACACTCTGGAAAA<br>R: TGTTAAGGCCATAGCTGCGT       | NM_173576.2      |
| <i>SCX</i>                            | F: AGAACACCCAGCCCAAACAGAT<br>R: TCGCGGTCCTTGCTCAACTTT     | NM_001080514.2   |
| <i>TNMD</i>                           | F: CCGCGTCTGTGAACCTTTAC<br>R: CACCCACCAGTTACAAGGCA        | NM_022144.2      |
| <b>ECM-related Genes</b>              |                                                           |                  |
| <i>COL1A1</i>                         | F: GCCAAGACGAAGACATCCCA<br>R: GGCAGTTCCTGGTCTCGTCA        | NM_000088.4      |
| <i>COL3A1</i>                         | F: TTGGCATGGTTCTGGCTTCC<br>R: GCTGGCTACTTCTCGTG           | NM_000090.3      |
| <i>DCN</i>                            | F: CAGCATTCCCTCAAGGTCTTCCT<br>R: GAGAGCCATTGTCAACAGCA     | NM_001920.3      |
| <i>MMP1</i>                           | F: ACCTGGAAAAATACTACAACCTGAA<br>R: TTCAATCCTGTACAGATGTGTT | NM_002421.3      |
| <i>MMP3</i>                           | F: CACTCACAGACCTGACTCGG<br>R: AGTCAGGGGGAGGTCCATAG        | NM_002422.4      |
| <i>TNC</i>                            | F: ACTGCCAAGTTCACAACAGACC<br>R: CCCACAATGACTTCCTTGACTG    | NM_002160.3      |
| <b>Phenotypic Drift-related Genes</b> |                                                           |                  |
| <i>ACTA2</i>                          | F: TAAGACGGGAATCCTGTGAAGC<br>R: TGTCCCATTCCCACCATCAC      | NM_001141945.1   |
| <i>RUNX2</i>                          | F: TTCCAGACCAGCAGCACTC<br>R: CAGCGTCAACACCATCATTC         | NM_001024630     |
| <i>SOX9</i>                           | F: TTCATGAAGATGACCGACGC<br>R: GTCCAGTCGTAGCCCTTGAG        | NM_000346.3      |
